# Supplementary material for: Tuning the architectures of polyoxometalate-templated complexes by changing the spacer lengths of bis-pyridyl-bis-amide ligands (L): from 1D chains to 2D networks based on different (CuL)n loops
Source: Royal Society of Chemistry journal article supplement (doi:10.1039/c2ce25371b), 2012-01-01
Supplement: c2ce25371b.pdf [file c2ce25371b.pdf]

Supplementary Material (ESI) for CrystEngComm  
This journal is © The Royal Society of Chemistry

## Tuning the architectures of polyoxometalate-templated complexes by changing the spacer lengths of bis-pyridyl-bis-amide ligands (L): From 1D chain to 2D networks based on different $(CuL)_n$ loops†

Xiuli Wang,\* Chuang Xu, Hongyan Lin, Guocheng Liu, Song Yang, Qiang Gao and Aixiang Tian

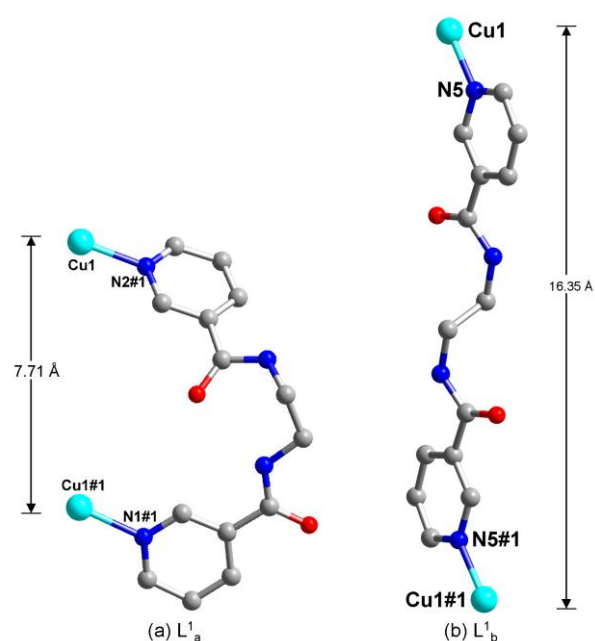

Fig. S1 Two types of configurations of  $L^1$  in **1**. Symmetry code: #1  $-x + 1, -y + 1, -z + 3$ .

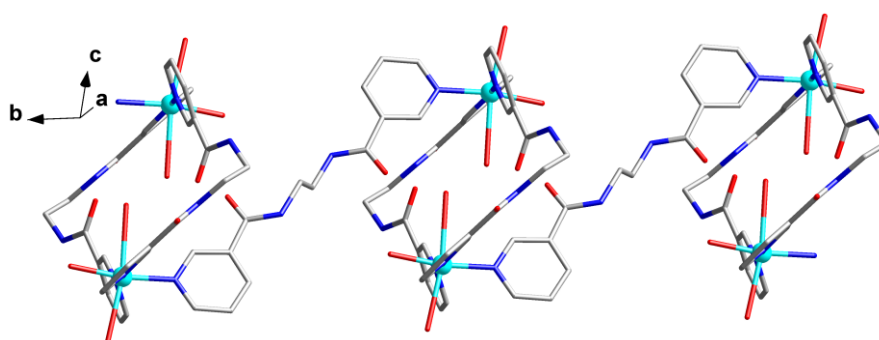

Fig. S2 The 1D chain based on the quadrate  $Cu_2(L^1_a)_2$  loop and  $L^1_b$  in **1**.

Supplementary Material (ESI) for CrystEngComm  
This journal is © The Royal Society of Chemistry

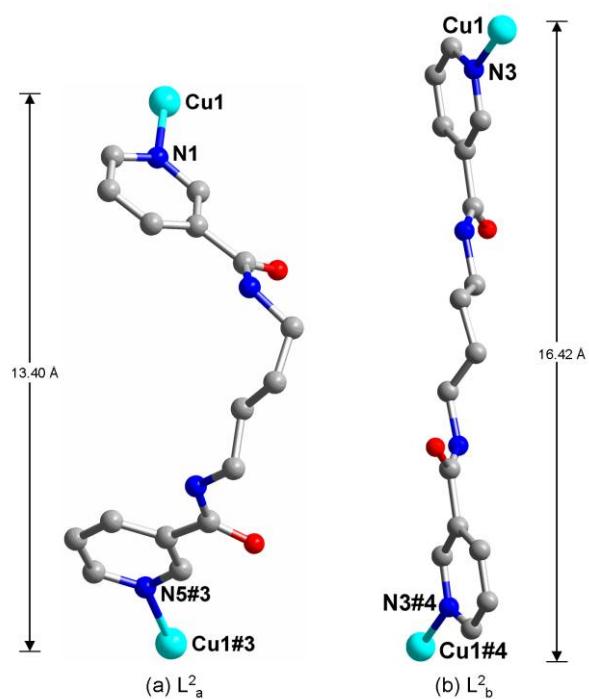

**Fig. S3** Two types of configurations of  $L^2$  in **2**. Symmetry code: #3  $-x + 1/2, -y - 1/2, -z + 1$ ; #4  $-x + 1/2, -y + 1/2, -z + 1$ .

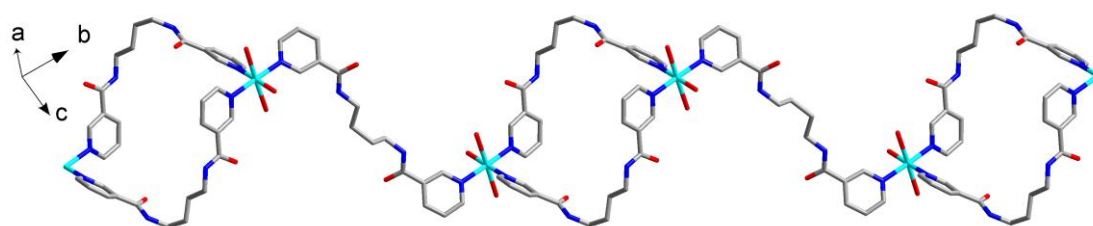

**Fig. S4** The 1D chain based on the square  $\text{Cu}_2(L^2_a)_2$  loop and  $L^2_b$  in **2**.

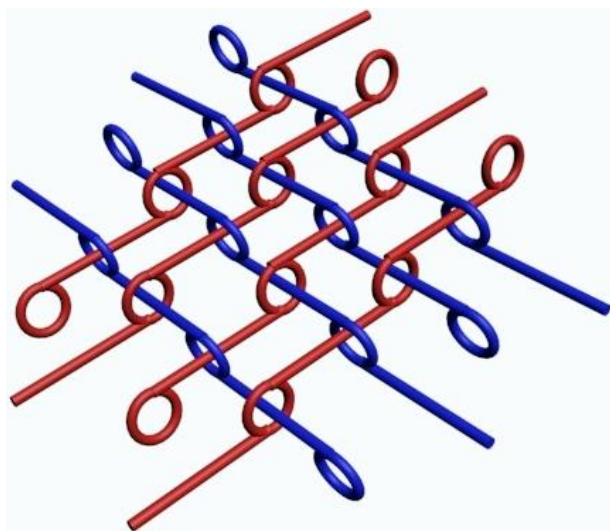

**Fig. S5** Schematic illustration of the 1D  $\rightarrow$  2D poly-rotaxane network in **2**.

Supplementary Material (ESI) for CrystEngComm  
This journal is © The Royal Society of Chemistry

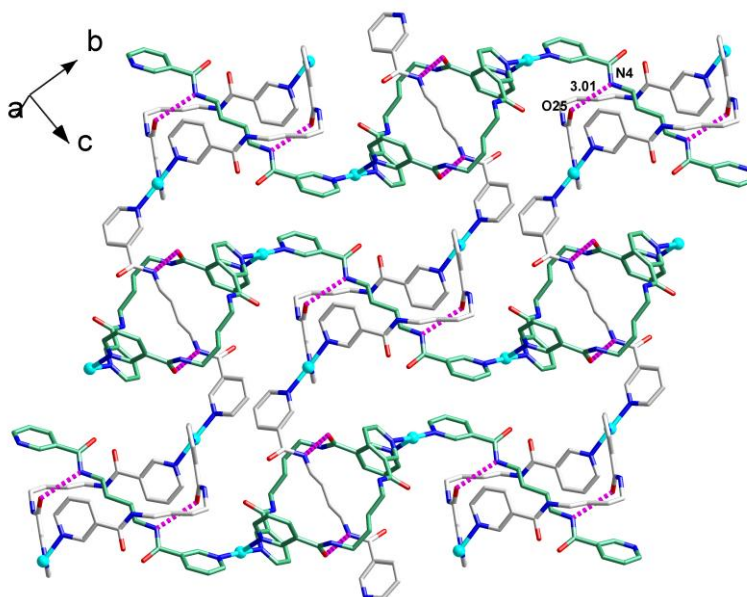

Fig. S6 The supramolecular interaction in compound **2**.

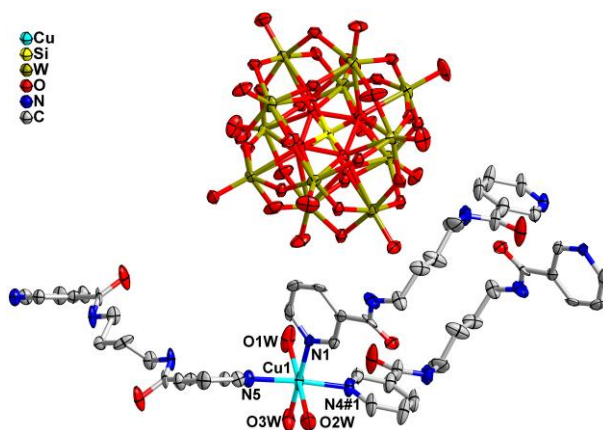

Fig. S7 The coordination environment of the Cu<sup>II</sup> ion in **3**. All H atoms and lattice water molecules are omitted for clarity. Symmetry code: #1  $-x + 1/2, -y + 1/2, -z + 1$ .

Supplementary Material (ESI) for CrystEngComm  
This journal is © The Royal Society of Chemistry

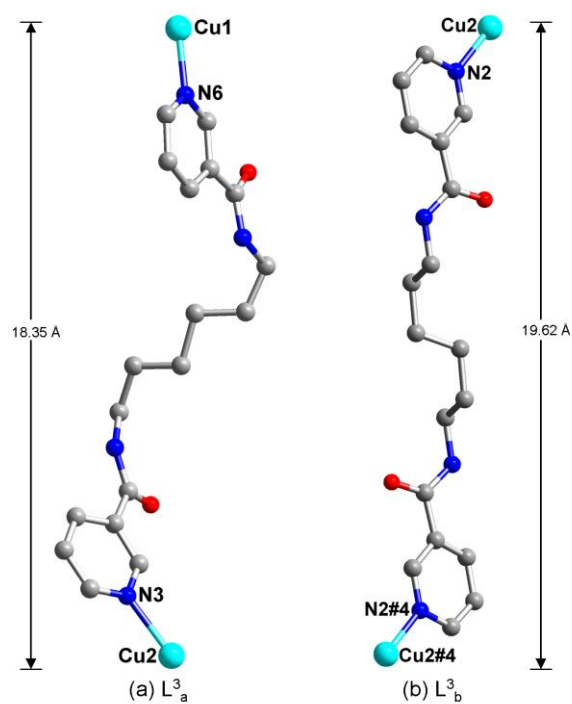

Fig. S8 Two types of configurations of  $L^3$  in **4**. Symmetry code: #4  $-x - 3, -y, -z - 1$ .

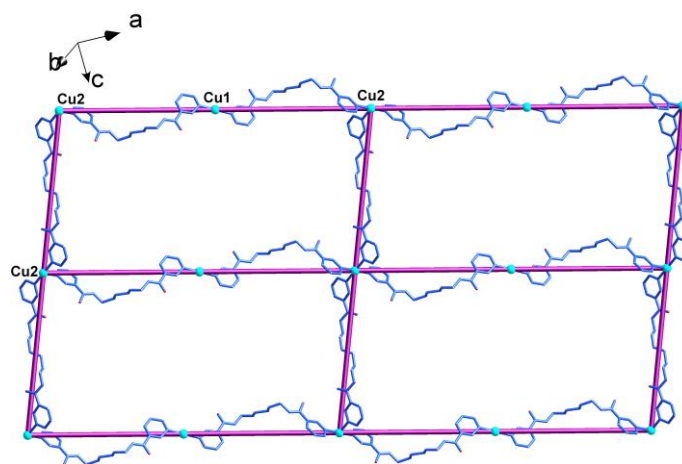

Fig. S9 The 2D network of **4**.

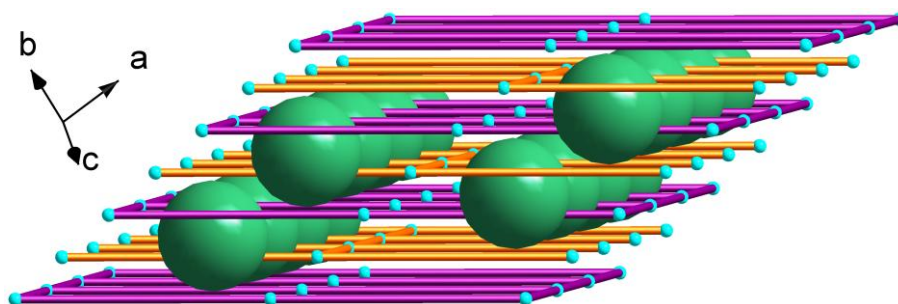

Fig. S10 The schematic view of  $\text{SiMo}_{12}$  anions sandwiched by adjacent stagger-packed 2D layers in **4**.

Supplementary Material (ESI) for CrystEngComm  
This journal is © The Royal Society of Chemistry

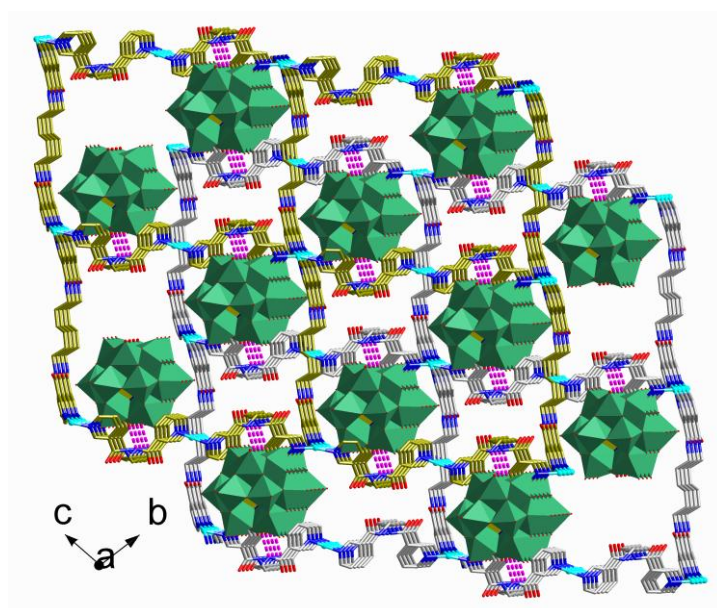

Fig. S11 The supramolecular interaction in compound 4.

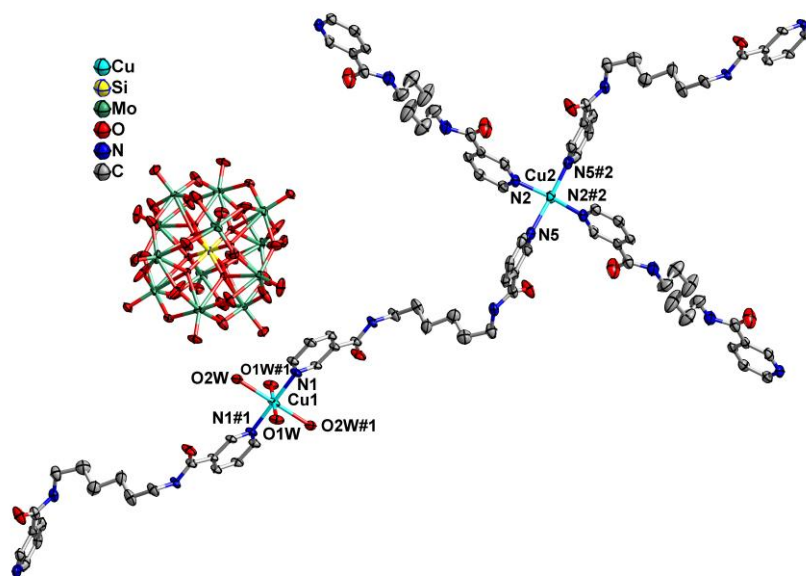

Fig. S12 The coordination environment of the Cu<sup>II</sup> ions in 5. All H atoms and lattice water molecules are omitted for clarity. Symmetry code: #1  $-x - 1, -y + 1, -z$ ; #2  $-x + 2, -y, -z + 1$

**Supplementary Material (ESI) for CrystEngComm**  
**This journal is © The Royal Society of Chemistry**

---

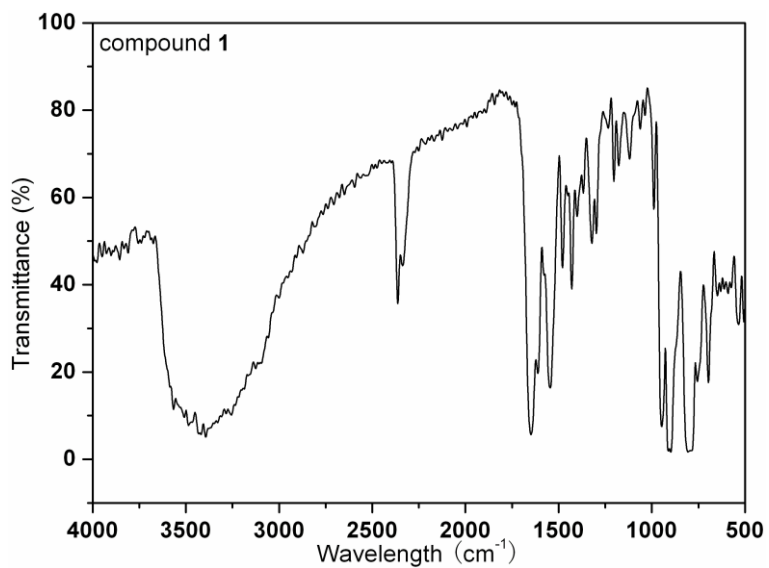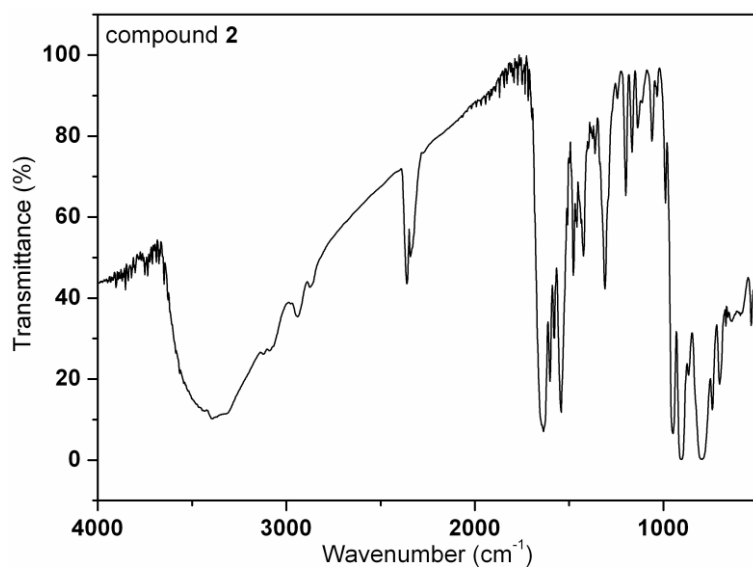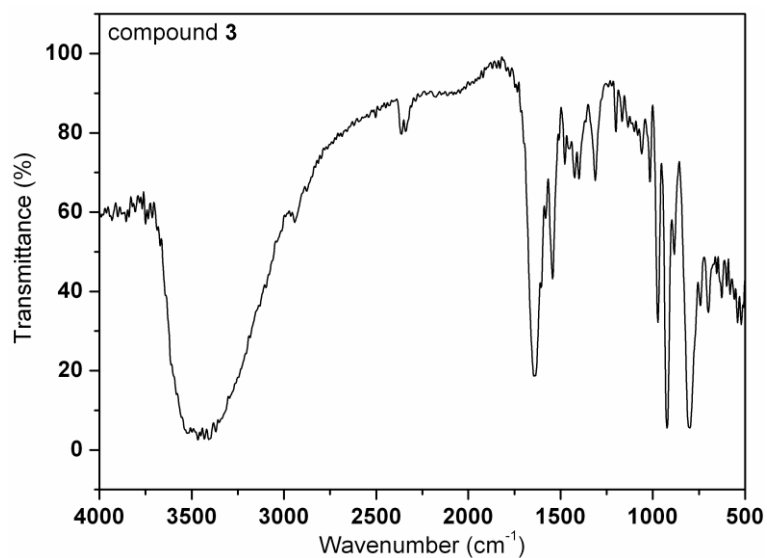

**Supplementary Material (ESI) for CrystEngComm**  
**This journal is © The Royal Society of Chemistry**

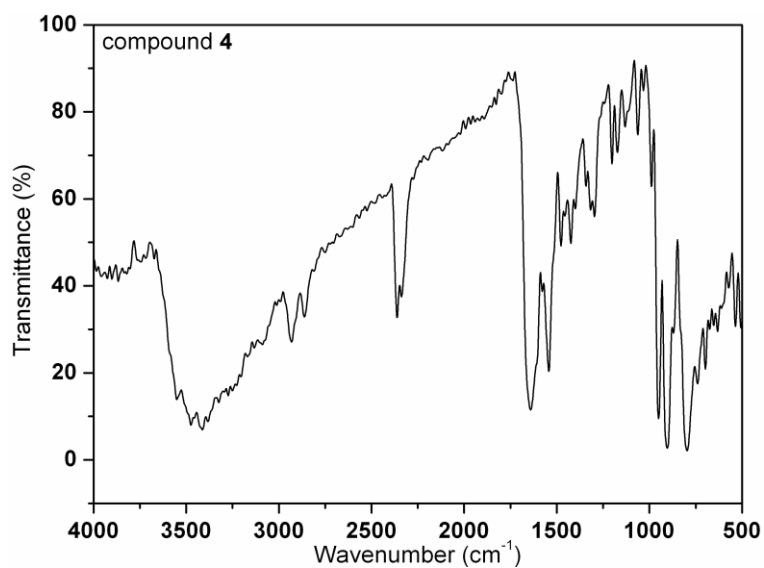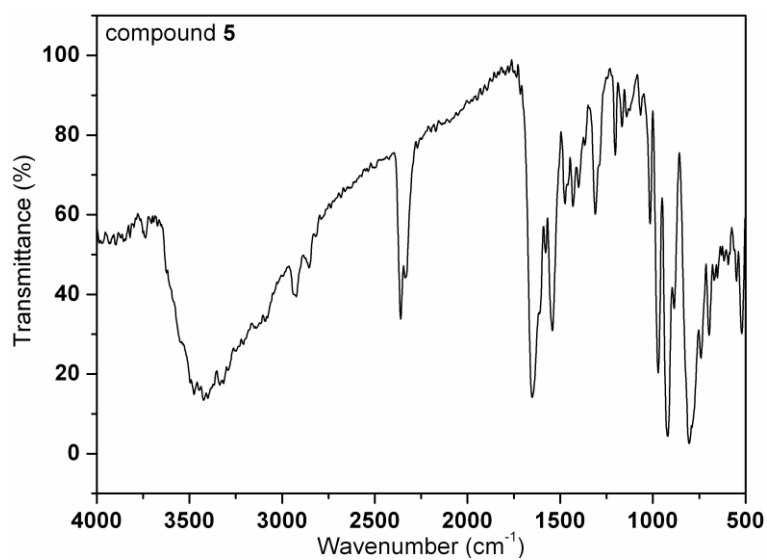

**Fig. S13** The IR spectra of compounds 1–5.

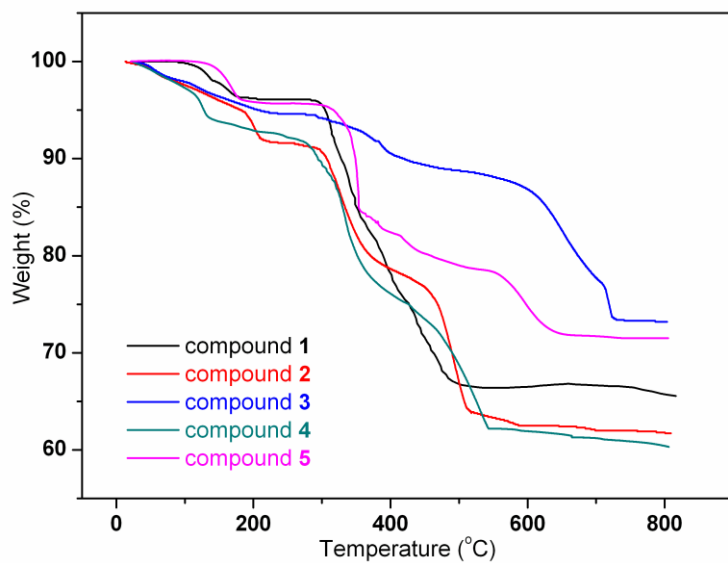

**Fig. S14** The TG curves of compounds 1–5.

Supplementary Material (ESI) for CrystEngComm  
This journal is © The Royal Society of Chemistry

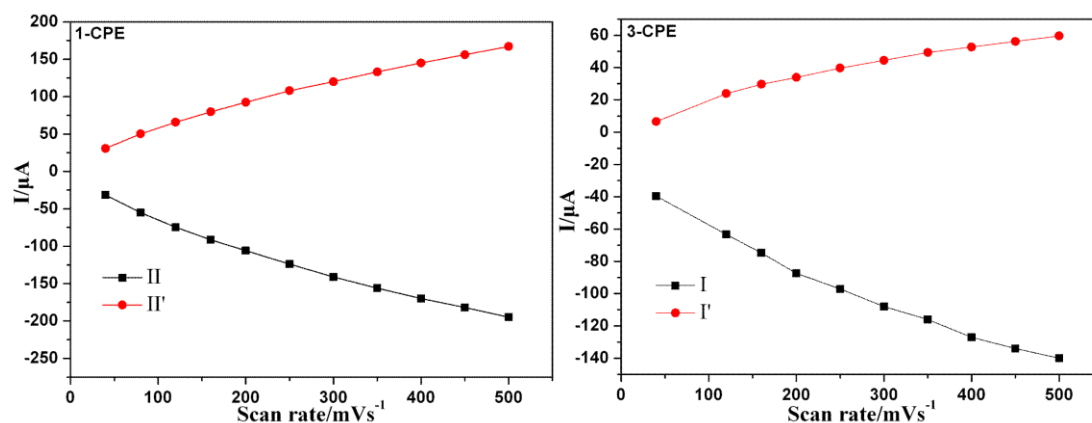

Fig. S15 The dependence of cathodic peak and anodic peak currents on scan rates of 1-CPE and 3-CPE.

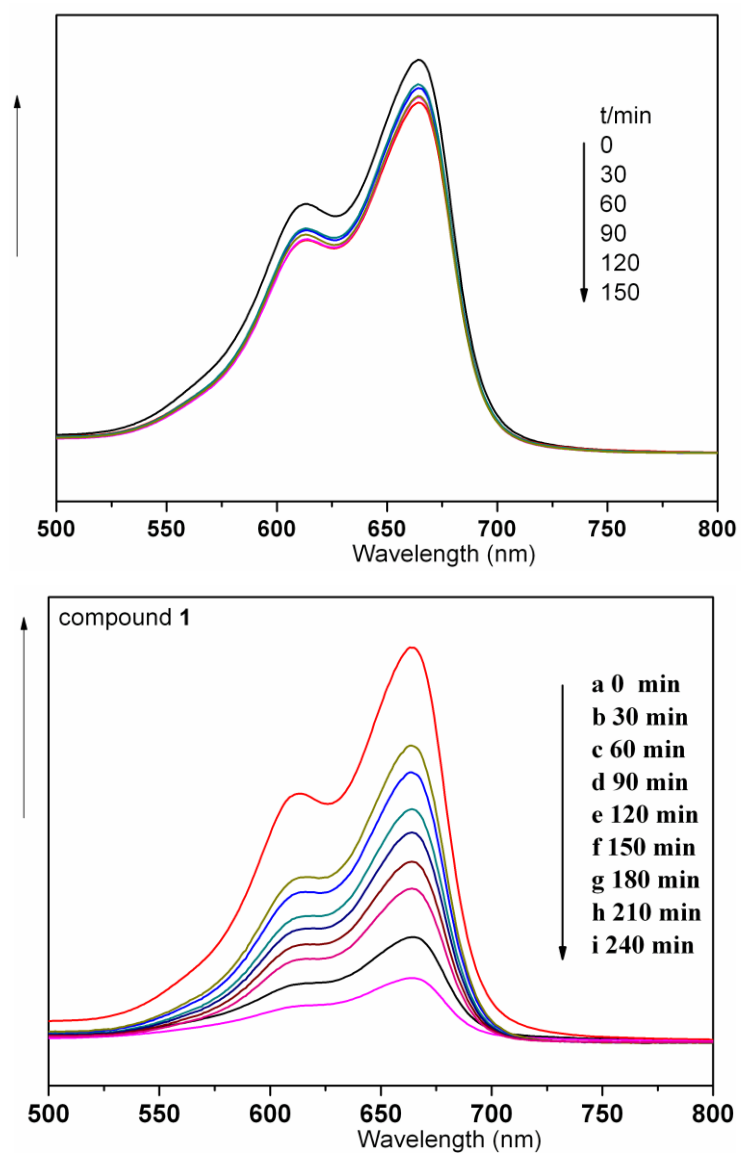



Supplementary Material (ESI) for CrystEngComm  
This journal is © The Royal Society of Chemistry

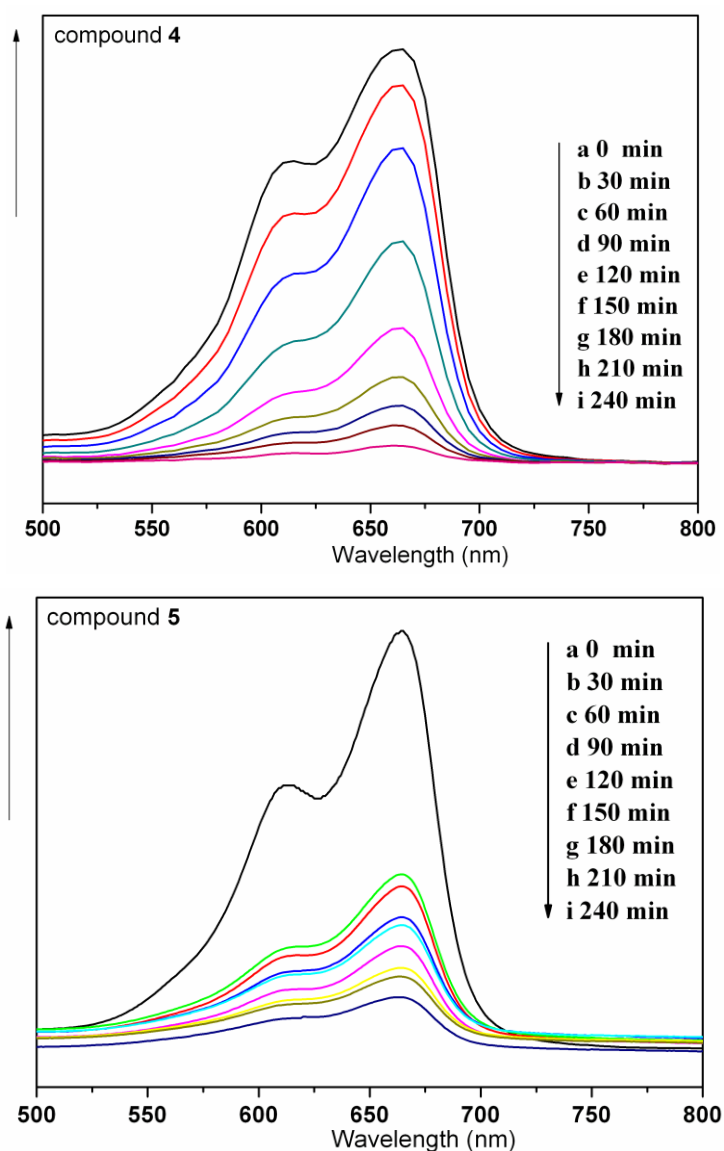

**Fig. S16** Absorption spectra of the MB solution during the decomposition reaction under UV light irradiation with the use of **1**, **4**, **5** and without catalyst.

**Table S1** Selected bond distances (Å) and angles (°) for compounds **1–5**.

| Compound <b>1</b>     |           |                      |           |
|-----------------------|-----------|----------------------|-----------|
| Cu(1)–O(1W)           | 2.004(10) | Cu(1)–N(5)           | 2.004(11) |
| Cu(1)–N(2)#1          | 2.024(11) | Cu(1)–N(1)           | 2.058(11) |
| Cu(1)–O(2W)#1         | 2.728(10) | Cu(1)–O(3W)#1        | 2.525(10) |
| O(1W)–Cu(1)–N(5)      | 171.2(4)  | O(1W)–Cu(1)–N(2)#1   | 90.0(4)   |
| N(5)–Cu(1)–N(2)#1     | 91.1(4)   | O(1W)–Cu(1)–N(1)     | 87.8(4)   |
| N(5)–Cu(1)–N(1)       | 91.7(4)   | N(2)#1–Cu(1)–N(1)    | 175.6(4)  |
| O(2W)#1–Cu(1)–N(5)    | 89.5(4)   | O(2W)#1–Cu(1)–N(2)#1 | 94.5(4)   |
| O(2W)#1–Cu(1)–O(3W)#1 | 169.5(4)  | O(2W)#1–Cu(1)–O(1W)  | 81.6(4)   |
| O(2W)#1–Cu(1)–N(1)    | 88.7(4)   | O(3W)#1–Cu(1)–N(5)   | 100.1(4)  |
| O(3W)#1–Cu(1)–N(2)#1  | 89.1(4)   | O(3W)#1–Cu(1)–N(1)   | 87.1(4)   |
| O(3W)#1–Cu(1)–O(1W)   | 88.6(4)   |                      |           |

**Supplementary Material (ESI) for CrystEngComm**  
**This journal is © The Royal Society of Chemistry**

Symmetry code for **1**: #1  $-x + 1, -y + 1, -z + 3$

**Compound 2**

|                   |          |                  |          |
|-------------------|----------|------------------|----------|
| N(1)–Cu(1)        | 2.028(9) | N(3)–Cu(1)       | 2.042(8) |
| N(5)–Cu(1)        | 2.043(9) | O(3W)–Cu(1)      | 2.019(8) |
| O(1W)–Cu(1)       | 2.502(9) | O(2W)–Cu(1)      | 2.551(8) |
| O(3W)–Cu(1)–N(1)  | 179.1(3) | O(3W)–Cu(1)–N(5) | 86.6(3)  |
| N(1)–Cu(1)–N(5)   | 94.3(3)  | O(3W)–Cu(1)–N(3) | 88.5(3)  |
| N(1)–Cu(1)–N(3)   | 90.6(3)  | N(5)–Cu(1)–N(3)  | 174.8(4) |
| O(3W)–Cu(1)–O(1W) | 92.1(4)  | N(1)–Cu(1)–O(1W) | 87.9(4)  |
| N(5)–Cu(1)–O(1W)  | 91.5(4)  | N(3)–Cu(1)–O(1W) | 90.5(3)  |
| O(3W)–Cu(1)–O(2W) | 89.4(4)  | N(1)–Cu(1)–O(2W) | 90.6(4)  |
| N(5)–Cu(1)–O(2W)  | 89.9(4)  | N(3)–Cu(1)–O(2W) | 88.3(3)  |
| O(1W)–Cu(1)–O(2W) | 178.1(4) |                  |          |

**Compound 3**

|                   |           |                    |           |
|-------------------|-----------|--------------------|-----------|
| Cu(1)–O(3W)       | 2.025(12) | Cu(1)–N(1)         | 2.028(12) |
| Cu(1)–N(5)        | 2.043(11) | Cu(1)–N(4)#1       | 2.053(12) |
| Cu(1)–O(2W)       | 2.431(15) | Cu(1)–O(1W)        | 2.522(15) |
| O(3W)–Cu(1)–N(1)  | 178.2(5)  | O(3W)–Cu(1)–N(5)   | 89.7(5)   |
| N(1)–Cu(1)–N(5)   | 90.5(5)   | O(3W)–Cu(1)–N(4)#1 | 85.8(5)   |
| N(1)–Cu(1)–N(4)#1 | 94.0(5)   | N(5)–Cu(1)–N(4)#1  | 175.3(5)  |
| O(3W)–Cu(1)–O(2W) | 89.9(6)   | N(1)–Cu(1)–O(2W)   | 91.9(5)   |
| N(5)–Cu(1)–O(2W)  | 89.3(5)   | N(4)#1–Cu(1)–O(2W) | 89.2(5)   |
| N(5)–Cu(1)–O(1W)  | 89.3(5)   | N(1)–Cu(1)–O(1W)   | 87.7(5)   |
| O(1W)–Cu(1)–O(2W) | 178.6(5)  | N(4)–Cu(1)–O(1W)   | 92.2(5)   |
| O(3W)–Cu(1)–O(1W) | 90.5(5)   |                    |           |

Symmetry code for **3**: #1  $-x + 1/2, -y + 1/2, -z + 1$

**Compound 4**

|                       |            |                      |            |
|-----------------------|------------|----------------------|------------|
| Cu(1)–N(6)#1          | 2.003(4)   | Cu(1)–N(6)           | 2.003(4)   |
| Cu(1)–O(2W)#1         | 2.041(4)   | Cu(1)–O(3W)#1        | 2.346(4)   |
| Cu(1)–O(3W)           | 2.346(4)   | Cu(1)–O(2W)          | 2.041(4)   |
| Cu(2)–N(3)#2          | 1.950(7)   | Cu(2)–N(2)           | 1.995(6)   |
| Cu(2)–N(2)#2          | 2.053(6)   | Cu(2)–N(3)           | 2.176(7)   |
| N(6)#1–Cu(1)–N(6)     | 179.998(1) | N(6)#1–Cu(1)–O(2W)#1 | 90.16(17)  |
| N(6)–Cu(1)–O(2W)#1    | 89.84(17)  | N(6)#1–Cu(1)–O(2W)   | 89.84(17)  |
| N(6)–Cu(1)–O(2W)      | 90.16(17)  | O(2W)#1–Cu(1)–O(2W)  | 180.0      |
| N(6)#1–Cu(1)–O(3W)#1  | 88.62(17)  | N(6)–Cu(1)–O(3W)#1   | 91.38(17)  |
| O(2W)#1–Cu(1)–O(3W)#1 | 89.52(18)  | O(2W)–Cu(1)–O(3W)#1  | 90.48(18)  |
| N(6)#1–Cu(1)–O(3W)    | 91.39(17)  | N(6)–Cu(1)–O(3W)     | 88.61(17)  |
| O(2W)#1–Cu(1)–O(3W)   | 90.48(18)  | O(2W)–Cu(1)–O(3W)    | 89.52(18)  |
| O(3W)#1–Cu(1)–O(3W)   | 179.997(1) | N(3)#2–Cu(2)–N(2)    | 92.3(3)    |
| N(3)#2–Cu(2)–N(2)#2   | 91.8(3)    | N(2)–Cu(2)–N(2)#2    | 162.82(10) |
| N(2)#2–Cu(2)–N(3)     | 84.6(2)    | N(3)#2–Cu(2)–N(3)    | 164.28(12) |
| N(2)–Cu(2)–N(3)       | 87.0(2)    |                      |            |

Symmetry code for **4**: #1  $-x, -y, -z + 1$ ; #2  $-x - 3, -y + 1, -z$

**Supplementary Material (ESI) for CrystEngComm**  
**This journal is © The Royal Society of Chemistry**

| Compound 5           |            |                       |            |
|----------------------|------------|-----------------------|------------|
| N(1)–Cu(1)           | 1.992(10)  | O(2W)–Cu(1)           | 2.348(10)  |
| O(1W)–Cu(1)          | 2.054(9)   | Cu(1)–N(1)#1          | 1.992(10)  |
| Cu(1)–O(1W)#1        | 2.054(9)   | Cu(1)–O(2W)#1         | 2.348(10)  |
| Cu(2)–N(5)#2         | 2.007(12)  | Cu(2)–N(2)#2          | 2.073(14)  |
| N(2)–Cu(2)           | 2.073(14)  | N(5)–Cu(2)            | 2.007(12)  |
| N(1)–Cu(1)–N(1)#1    | 179.997(1) | N(1)–Cu(1)–O(1W)      | 90.2(4)    |
| N(1)#1–Cu(1)–O(1W)   | 89.8(4)    | N(1)–Cu(1)–O(1W)#1    | 89.8(4)    |
| N(1)#1–Cu(1)–O(1W)#1 | 90.2(4)    | O(1W)–Cu(1)–O(1W)#1   | 179.997(1) |
| N(1)–Cu(1)–O(2W)     | 89.3(4)    | N(1)#1–Cu(1)–O(2W)    | 90.7(4)    |
| O(1W)–Cu(1)–O(2W)    | 90.6(4)    | O(1W)#1–Cu(1)–O(2W)   | 89.4(4)    |
| N(1)–Cu(1)–O(2W)#1   | 90.7(4)    | N(1)#1–Cu(1)–O(2W)#1  | 89.3(4)    |
| O(1W)–Cu(1)–O(2W)#1  | 89.4(4)    | O(1W)#1–Cu(1)–O(2W)#1 | 90.6(4)    |
| O(2W)–Cu(1)–O(2W)#1  | 179.999(1) | N(5)#2–Cu(2)–N(5)     | 179.999(2) |
| N(5)#2–Cu(2)–N(2)    | 90.0(5)    | N(5)–Cu(2)–N(2)       | 90.0(5)    |
| N(5)#2–Cu(2)–N(2)#2  | 90.0(5)    | N(5)–Cu(2)–N(2)#2     | 90.0(5)    |
| N(2)–Cu(2)–N(2)#2    | 180.0(7)   |                       |            |

Symmetry code for 5: #1  $-x - 1, -y + 1, -z$ ; #2  $-x + 2, -y, -z + 1$

**Table S2.** Selected Hydrogen-Bonding Geometry (Å, °) for compound 1

| D–H...A              | D–H  | H...A | D...A | D–H...A |
|----------------------|------|-------|-------|---------|
| C(15)–H(15A)...O(16) | 0.97 | 2.33  | 3.02  | 128     |

**Table S3.** Selected Hydrogen-Bonding Geometry (Å, °) for compound 2

| D–H...A            | D–H  | H...A | D...A | D–H...A |
|--------------------|------|-------|-------|---------|
| N(4)–H(4C)...O(25) | 0.86 | 2.18  | 3.01  | 163     |

**Table S4.** Selected Hydrogen-Bonding Geometry (Å, °) for compound 4

| D–H...A            | D–H  | H...A | D...A | D–H...A |
|--------------------|------|-------|-------|---------|
| N(5)–H(5B)...O(19) | 0.86 | 2.04  | 2.85  | 158     |
